# Supplementary material
Source: publisher figshare collection journal article supplement (https://acs.figshare.com/ndownloader/files/6864228)
Supplement: Supplementary file 1 [file 6864228]

## Supplementary Information

### Highly efficient hydrogen evolution from edge-oriented WS<sub>2(1-x)</sub>Se<sub>2x</sub> particles on three-dimensional porous NiSe<sub>2</sub> foam

*Haiqing Zhou, Fang Yu, Jingying Sun, Hangtian Zhu, Ishwar Kumar Mishra, Shuo Chen\*, and Zhifeng Ren\**

\* Correspondence and requests for materials should be addressed to S. C. schen34@uh.edu or Z. F. R. zren@uh.edu.

#### 1. Material and Methods

The ammonium tetrathiotungstate ((NH<sub>4</sub>)<sub>2</sub>WS<sub>4</sub>, 336734-5g) and selenium (Se, 99.5%, 209651-250g) powders were purchased from Sigma Aldrich. Thermal selenization of commercial Ni foams and the growth of WS<sub>2(1-x)</sub>Se<sub>2x</sub> particles were carried out in a tube furnace. Before thermal selenization, commercial Ni foam was divided into regular pieces with an estimated geometric area of 1 cm<sup>2</sup>. Then a piece of the 1cm<sup>2</sup> Ni foam was placed at the center of the furnace and thermally selenized at around 600 °C for 1h with the Se powder supplied at the upstream. For the growth of WS<sub>2(1-x)</sub>Se<sub>2x</sub> particles, the as-prepared NiSe<sub>2</sub> foams were dipped into a precursor containing (NH<sub>4</sub>)<sub>2</sub>WS<sub>4</sub> in dimethylformamide (DMF) solvent (5 wt% in DMF), which were then vacuum dried at 100 °C for 30 min. To grow pure WS<sub>2</sub> or ternary WS<sub>2(1-x)</sub>Se<sub>2x</sub> particles, we performed thermolysis or a second selenization in a tube furnace at 500 °C with the presence of Ar gas, respectively. After that, the furnace was automatically turned off and cooled down under Ar gas.

The electrochemical performance was studied by an electrochemical station (Gamry, Reference 600). The hybrid catalysts, a Pt wire and a saturated calomel electrode (SCE) were served as the working, counter and reference electrodes, respectively. All the tests were performed under saturated N<sub>2</sub> atmosphere (Matheson, 99.9999%). We have calibrated the reference electrode by a Pt wire in H<sub>2</sub> gas (Matheson, 99.9999%). All the potentials reported here were calibrated to a RHE with a value of 0.263 V difference. The cycling tests were conducted to investigate the catalyst stability at a scan rate of 50 mV/s and potential ranges from 0.06 V to - 0.2 V. Linear sweep voltammetry was utilized to gather the polarization curves at a scan rate of 2 mV/s. All the curves were reported with iR compensation. Chronoamperometry was also carried out to study the time-dependent current density at a specific potential of - 0.145 V. Cyclic voltammetry (CV) curves were collected at different scan rates in the potentials from 0.1 V to 0.2 V, so as to evaluate the double-layer capacitance values. Finally, the electrochemical impedance spectroscopy (EIS) spectra were gathered at a constant potential of - 0.15 V, and the frequencies varied from 10 mHz to 1 MHz. A simplified Randles circuit was applied to fit the EIS spectra.

## 2. The morphologies of the starting Ni foam and as-prepared NiSe<sub>2</sub> foam

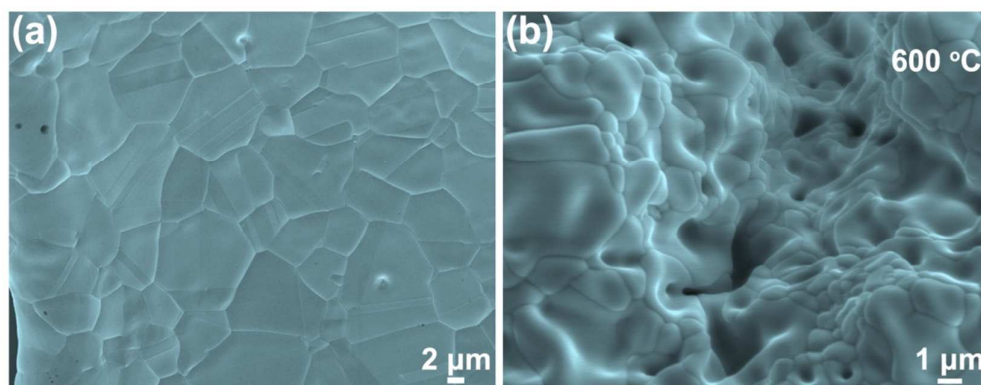

**Figure S1.** High-magnification SEM images of the starting Ni foam (a) and as-prepared porous NiSe<sub>2</sub>

foam grown at 600 °C (b). It is clear that the starting Ni foam is composed of many Ni grains in the Ni region. Instead, there are more porous structures in the NiSe<sub>2</sub> region after selenization.

### 3. Characterization of as-prepared NiSe<sub>2</sub> samples by XRD and XPS

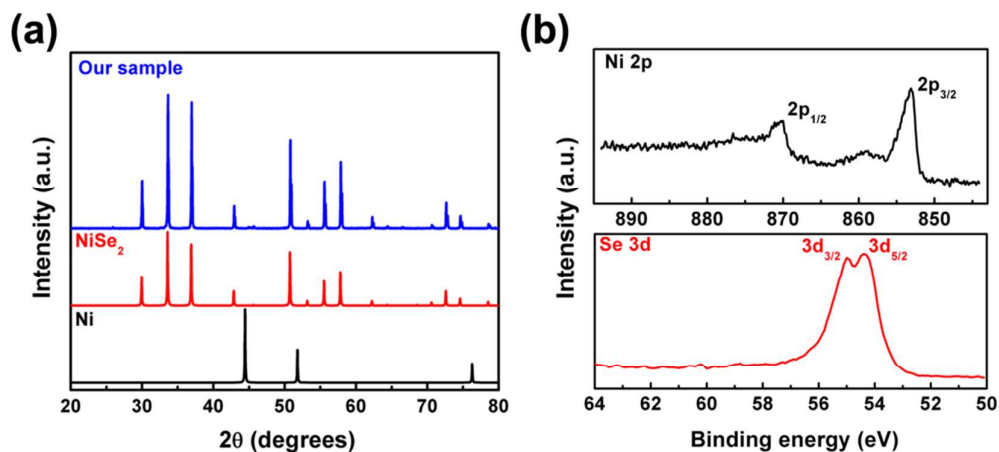

**Figure S2.** Characterization of the as-prepared NiSe<sub>2</sub> foams by powder X-ray diffraction (XRD) (a) and XPS (b). It is evident that the main compound is pyrite NiSe<sub>2</sub>, rather than other nickel selenides, and very small fraction of metallic Ni exists in the as-prepared samples.

### 4. Typical XPS spectrum of Ni 2p region on WS<sub>2(1-x)</sub>Se<sub>2x</sub>/NiSe<sub>2</sub> hybrid catalyst

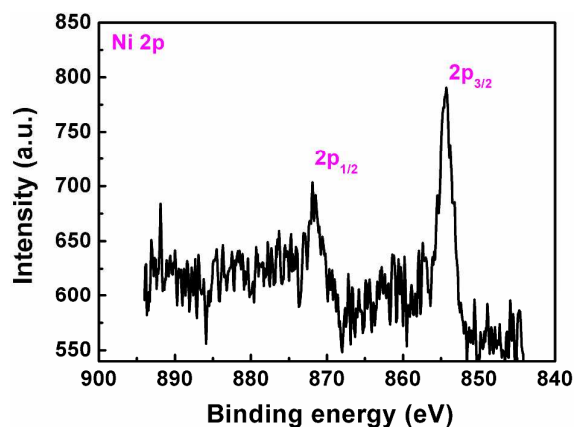

**Figure S3.** XPS spectrum of Ni 2p region collected on WS<sub>2(1-x)</sub>Se<sub>2x</sub>/NiSe<sub>2</sub> hybrid catalyst.

## 5. Energy dispersive X-ray spectrum (EDS) of the tungsten compound

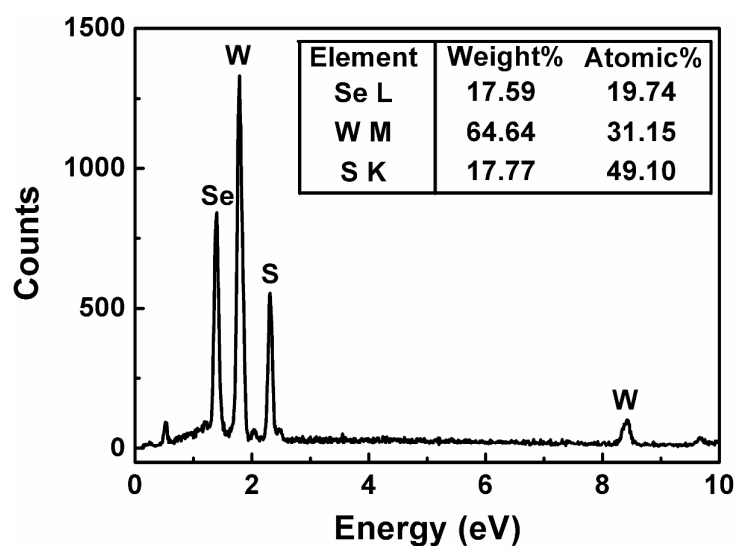

**Figure S4.** EDS analysis on the chemical composition of as-prepared  $\text{WS}_{2(1-x)}\text{Se}_{2x}$  particles aggregating and extruding from the edge of  $\text{NiSe}_2$  region.

## 6. Capacitance measurements

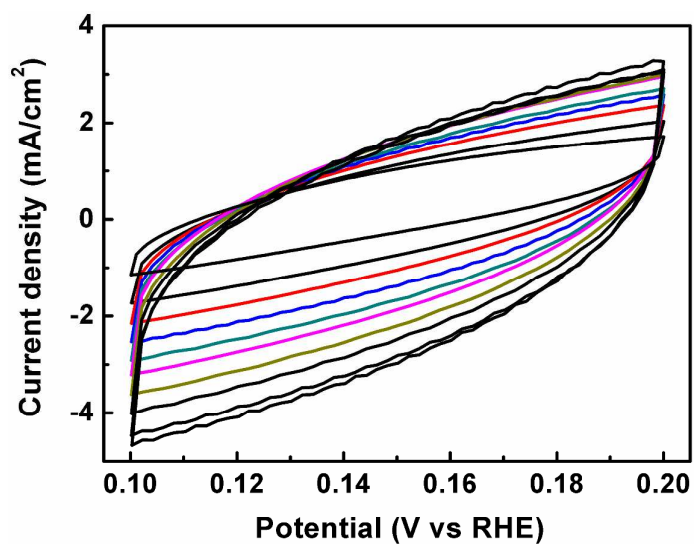

**Figure S5.** Electrochemical cyclic voltammetry curves of as-grown NiSe<sub>2</sub> foam at different potential scan rates tuning from 20 mV/s to 200 mV/s with an interval point of 20 mV/s.

## 7. The comparison of our catalysts to other available low-cost electrocatalysts

**Table S1.** The comparison on the catalytic properties of our catalysts with other available non-noble HER electrocatalysts in the literatures. Here  $j_0$  is the exchange current density,  $\eta_{10}$ ,  $\eta_{20}$  and  $\eta_{100}$  correspond to the potentials vs RHE at current densities of 10 mA/cm<sup>2</sup>, 20 mA/cm<sup>2</sup> and 100 mA/cm<sup>2</sup>, respectively.

| Catalyst                                                     | Tafel slope | $\eta_{10}$ | $\eta_{20}$ | $\eta_{100}$ | $j_0$                        | Source                                                 |
|--------------------------------------------------------------|-------------|-------------|-------------|--------------|------------------------------|--------------------------------------------------------|
| WS <sub>2</sub> (1-x)Se <sub>2x</sub> /NiSe <sub>2</sub>     | 46.7 mV/dec | 88 mV       | 105 mV      | 141 mV       | 215 $\mu$ A/cm <sup>2</sup>  | This work                                              |
| WS <sub>2</sub> /NiSe <sub>2</sub>                           | 54.7 mV/dec | 108 mV      | 165 mV      | 115 mV       | 127 $\mu$ A/cm <sup>2</sup>  | This work                                              |
| NiSe <sub>2</sub> nanosheet                                  | 32 mV/dec   | 117 mV      |             |              | 4.7 $\mu$ A/cm <sup>2</sup>  | <i>Angew. Chem. Int. Ed.</i> <b>55</b> , 6919 (2016)   |
| Ni <sub>5</sub> P <sub>4</sub> -Ni <sub>2</sub> P nanosheets | 79 mV/dec   | 120 mV      | 140 mV      | 200 mV       | 116 $\mu$ A/cm <sup>2</sup>  | <i>Angew. Chem. Int. Ed.</i> <b>54</b> , 8188 (2015)   |
| MoS <sub>x</sub> /N-CNT                                      | 40 mV/dec   | 110 mV      | 128 mV      | 225 mV       | 33.1 $\mu$ A/cm <sup>2</sup> | <i>Nano Lett.</i> <b>14</b> , 1228 (2014)              |
| Li-MoS <sub>2</sub>                                          | 62 mV/dec   | 118 mV      | 135 mV      | 175 mV       | 63 $\mu$ A/cm <sup>2</sup>   | <i>ACS Nano</i> <b>8</b> , 4940 (2014)                 |
| CoS <sub>2</sub> /RGO-CNT                                    | 51 mV/dec   | 142 mV      | 153 mV      | 178 mV       | 62.6 $\mu$ A/cm <sup>2</sup> | <i>Angew. Chem. Int. Ed.</i> <b>126</b> , 12802 (2014) |
| CoSe <sub>2</sub> /carbon fiber                              | 42 mV/dec   | 139 mV      | 155 mV      | 184 mV       | 6 $\mu$ A/cm <sup>2</sup>    | <i>J. Am. Chem. Soc.</i> <b>136</b> , 4897 (2014)      |
| CoS <sub>1.46</sub> Se <sub>0.54</sub> NWs/CFP               | 45 mV/dec   | 104 mV      | 126 mV      | 157 mV       |                              | <i>Nano Energy</i> <b>18</b> , 1 (2015)                |
| WS <sub>2</sub> nanosheets                                   | 55 mV/dec   | 240 mV      | 280 mV      |              | 20 $\mu$ A/cm <sup>2</sup>   | <i>Nat. Mater.</i> <b>12</b> , 850 (2013)              |
| WS <sub>2</sub> nanosheets                                   | 70 mV/dec   | 142 mV      | 170 mV      | 288 mV       | 93 $\mu$ A/cm <sup>2</sup>   | <i>Energy Environ. Sci.</i> <b>7</b> , 2608 (2014)     |

|                                                      |           |        |        |        |                               |                                                    |
|------------------------------------------------------|-----------|--------|--------|--------|-------------------------------|----------------------------------------------------|
| WS <sub>1.56</sub> Se <sub>0.44</sub> nanoribbons    | 68 mV/dec | 176 mV |        |        | 25 $\mu\text{A}/\text{cm}^2$  | <i>Adv. Funct. Mater.</i> <b>25</b> , 6077 (2015)  |
| Ni <sub>2</sub> P nanoparticles                      | 46 mV/dec | 105 mV | 130 mV | 180 mV | 33 $\mu\text{A}/\text{cm}^2$  | <i>J. Am. Chem. Soc.</i> <b>135</b> , 9267 (2013)  |
| MoC <sub>x</sub> nano-octahedrons                    | 53 mV/dec | 142 mV | 163 mV | 240 mV | 23 $\mu\text{A}/\text{cm}^2$  | <i>Nat. Commun.</i> <b>6</b> , 6512 (2015)         |
| Metallic FeNiS                                       | 40 mV/dec | 105 mV | 140 mV | 180 mV | 20 $\mu\text{A}/\text{cm}^2$  | <i>J. Am. Chem. Soc.</i> <b>137</b> , 11900 (2015) |
| Mo-W-P nanosheets/CC                                 | 52 mV/dec | 100 mV |        | 138 mV | 288 $\mu\text{A}/\text{cm}^2$ | <i>Energy Environ. Sci.</i> <b>9</b> , 1468 (2016) |
| NiP <sub>1.93</sub> Se <sub>0.07</sub> /carbon paper | 41 mV/dec | 84 mV  | 110 mV |        | 100 $\mu\text{A}/\text{cm}^2$ | <i>ACS Catal.</i> <b>5</b> , 6355 (2015)           |
| CoPS/carbon paper                                    | 56 mV/dec | 48 mV  | 65 mV  |        | 984 $\mu\text{A}/\text{cm}^2$ | <i>Nat. Mater.</i> <b>14</b> , 1245 (2015)         |

## 8. Summary of the electrochemical properties among different catalysts

**Table S2.** Summary of the electrochemical properties of pure NiSe<sub>2</sub> foam, WS<sub>2</sub>/NiSe<sub>2</sub> and WS<sub>2(1-x)</sub>Se<sub>2x</sub>/NiSe<sub>2</sub> hybrid electrodes.  $j_{0,\text{normalized}}$  is normalized by the relative surface area.

| Catalyst                                                 | $\eta_{10}$ | Tafel slope | $C_{dl}$                 | $j_{0,\text{geometric}}$       | Relative surface area | $j_{0,\text{normalized}}$      |
|----------------------------------------------------------|-------------|-------------|--------------------------|--------------------------------|-----------------------|--------------------------------|
| WS <sub>2(1-x)</sub> Se <sub>2x</sub> /NiSe <sub>2</sub> | 88 mV       | 46.7 mV/dec | 256.9 mF/cm <sup>2</sup> | 215 $\mu\text{A}/\text{cm}^2$  | 28.54                 | 8.54 $\mu\text{A}/\text{cm}^2$ |
| WS <sub>2</sub> /NiSe <sub>2</sub>                       | 108 mV      | 54.7 mV/dec | 180.9 mF/cm <sup>2</sup> | 127 $\mu\text{A}/\text{cm}^2$  | 20.10                 | 6.46 $\mu\text{A}/\text{cm}^2$ |
| Pure NiSe <sub>2</sub>                                   | 154 mV      | 46.8 mV/dec | 9.0 mF/cm <sup>2</sup>   | 10.0 $\mu\text{A}/\text{cm}^2$ | 1.00                  | 10.0 $\mu\text{A}/\text{cm}^2$ |
